# Supplementary material for: Volatile and Dissolved Organic Carbon Sources Have Distinct Effects on Microbial Activity, Nitrogen Content, and Bacterial Communities in Soil.
Source: Research Square preprint supplement (doi:10.21203/rs.3.rs-1041309/v1), 2021-11-18
Supplement: Supplementary file 1 [file 97cd0bb9a1d9ca7541c09ac9.docx]

Supplemental Figure 1

Dissolved organic carbon assessed at the end of the experiment: carbon only effect. Displayed on boxplots are the median, the two hinges of the box represent the interquartile range, and the whiskers extend 1.5 * interquartile range, outlying points are plotted individually. Different letters denote statistically significant treatment effects based on pairwise comparisons adjusted using Tukey’s test., alpha = 0.1. Different letters denote statistically significant treatment effects based on pairwise comparisons adjusted using Tukey’s test., alpha = 0.1.


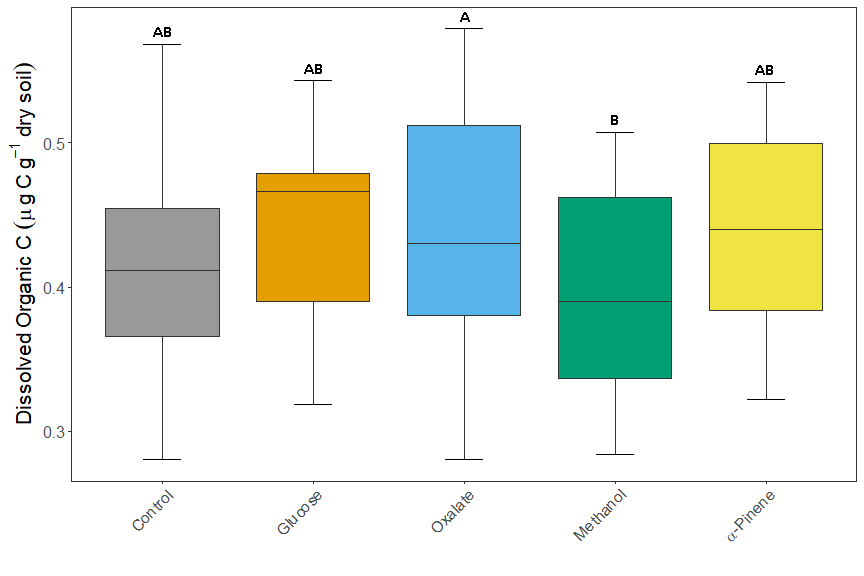


Supplemental Figure 2: Simpson Diversity for the carbon source x soil moisture effect (A), and the carbon source effect (BDisplayed on boxplots are the median, the two hinges of the box represent the interquartile range, and the whiskers extend 1.5 * interquartile range, outlying points are plotted individually. Different letters denote statistically significant treatment effects based on pairwise comparisons adjusted using Tukey’s test., alpha = 0.1.


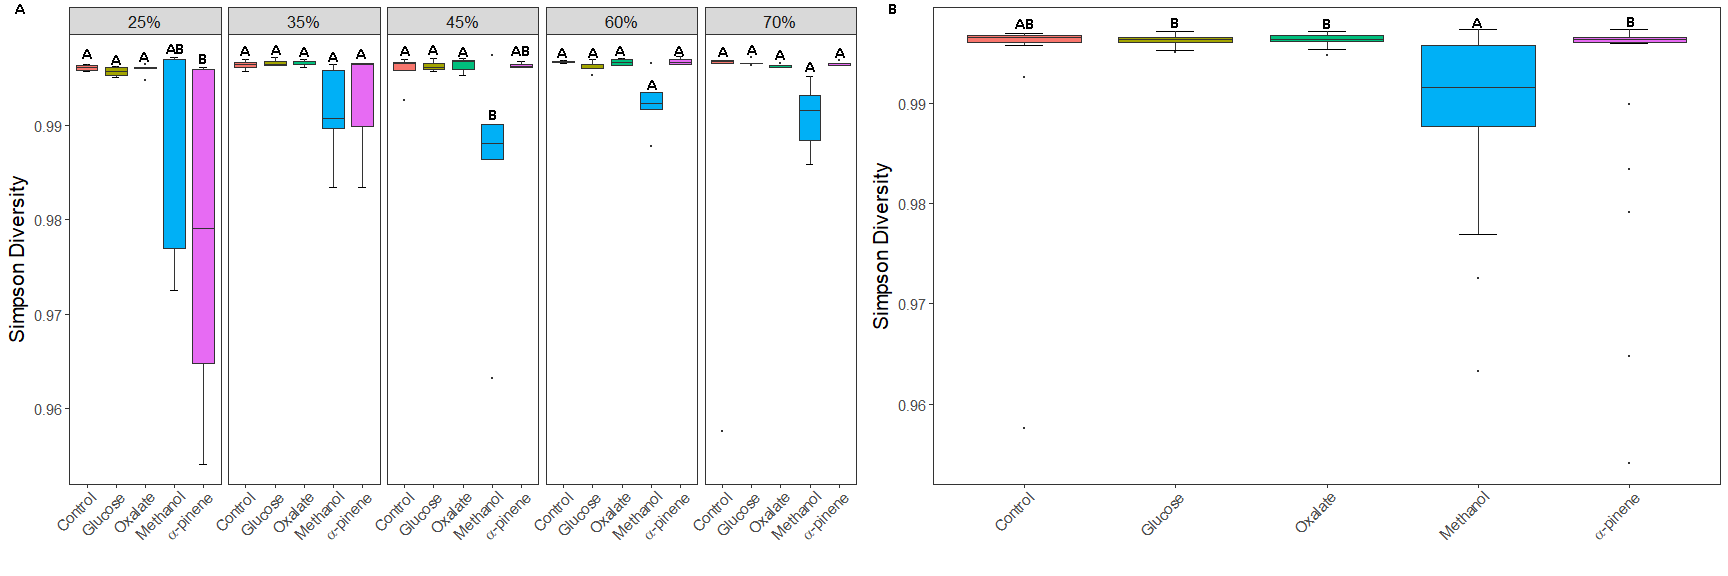


Supplemental Figure 3 The phyla retained in the best-subsets multiple regression, and that had significant C amendment interaction with moisture for microbial activity. Dendrograms on heat maps reflect similarity of relative abundance patterns of phyla between carbon treatments (complete-linkage clustering) - they do not reflect phylogenetic relationships.


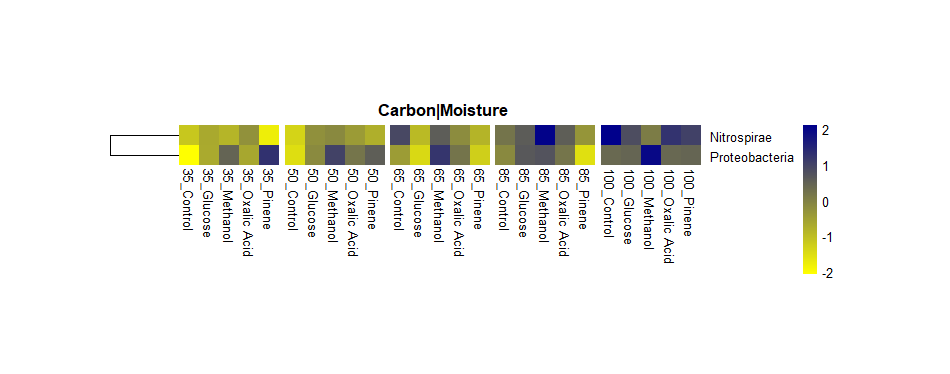


Supplemental Figure 4: The most abundant families found in each of phyla retained in the best-subsets multiple regression, and that had significant C amendment effects for microbial activity (A), and total extractable N (B). Dendrograms on heat maps reflect similarity of relative abundance patterns of phyla between carbon treatments (complete-linkage clustering) - they do not reflect phylogenetic relationships.


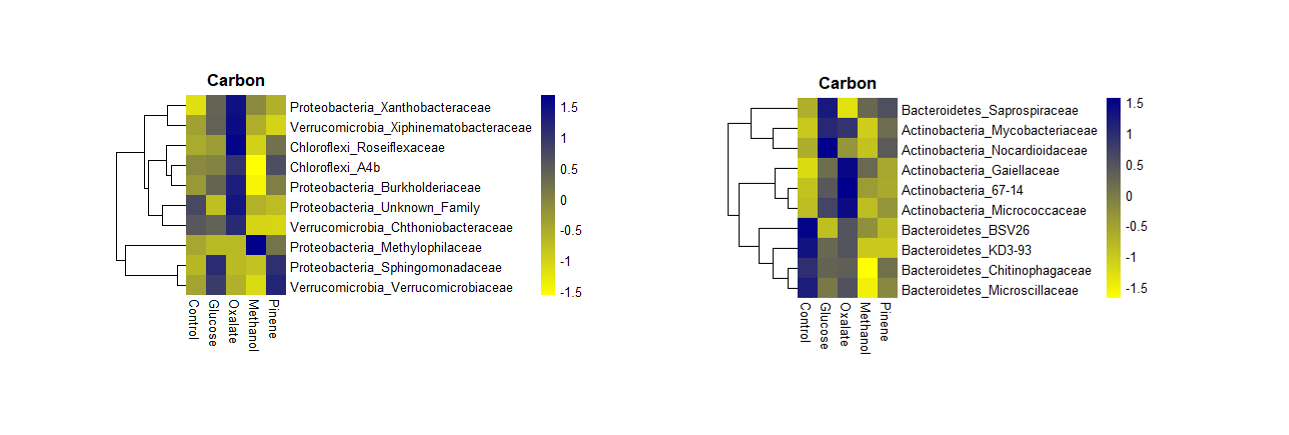


Supplemental Table 1: The top 8 families with greater than 0.1% abundance from the phyla that were retained in the best-subsets multiple regression models; * *P* < 0.1, ** *P* < 0.05, N.S. (Not significant) *P* > 0.1.

| Phyla | Family | Relative Abundance | Carbon | Carbon X Moisture |
| --- | --- | --- | --- | --- |
| Actinobacteria | Gaiellaceae | 0.0083 | * | ** |
| 67-14 | 0.0071 | ** | N.S. |
| Mycobacteriaceae | 0.0063 | ** | ** |
| Nocardioidaceae | 0.0058 | ** | N.S. |
| Solirubrobacteraceae | 0.0046 | N.S. | N.S. |
| Micrococcaceae | 0.0043 | ** | N.S. |
| Micromonosporaceae | 0.0039 | N.S. | N.S. |
| Pseudonocardiaceae | 0.0025 | N.S. | N.S. |
| Bacteroidetes | Chitinophagaceae | 0.0433 | ** | ** |
| Microscillaceae | 0.0193 | ** | ** |
| env.OPS_17 | 0.0081 | N.S. | N.S. |
| Flavobacteriaceae | 0.0075 | N.S. | ** |
| Saprospiraceae | 0.0063 | ** | N.S. |
| AKYH767 | 0.0059 | N.S. | N.S. |
| KD3-93 | 0.0013 | ** | ** |
| BSV26 | 0.0012 | * | N.S. |
| Chloroflexi | A4b | 0.0022 | * | ** |
| Roseiflexaceae | 0.0014 | ** | N.S. |
| Proteobacteria | Xanthobacteraceae | 0.0672 | * | N.S. |
| Nitrosomonadaceae | 0.0439 | N.S. | N.S. |
| Methylophilaceae | 0.0317 | ** | ** |
| Burkholderiaceae | 0.0289 | ** | ** |
| SC-I-84 | 0.0145 | N.S. | N.S. |
| Unknown_Family | 0.0145 | * | N.S. |
| Steroidobacteraceae | 0.0132 | N.S. | N.S. |
| Sphingomonadaceae | 0.0114 | ** | ** |
| Verrucomicrobia | Chthoniobacteraceae | 0.0371 | ** | * |
| Pedosphaeraceae | 0.0293 | N.S. | N.S. |
| Xiphinematobacteraceae | 0.0047 | ** | N.S. |
| Opitutaceae | 0.0034 | N.S. | * |
| Verrucomicrobiaceae | 0.0013 | ** | N.S. |
| Rubritaleaceae | 0.0011 | N.S. | N.S. |
